# Supplementary material for: Control of plugging in bifunctional periodic mesoporous organosilica with imidazolium framework (BFPMO) via stepwise addition of silica precursors
Source: Royal Society of Chemistry journal article supplement (doi:10.1039/c4ta06542e), 2015-01-01
Supplement: c4ta06542e1.pdf [file c4ta06542e1.pdf]

**Supplementary information for**

**Control of plugging in bifunctional periodic  
mesoporous organosilica with imidazolium  
framework (BFPMO) via stepwise addition of  
silica precursors**

Babak Karimi,<sup>\*a</sup> Mojtaba Khorasani,<sup>a</sup> Hojatollah Vali,<sup>b</sup> and Rafael Luque<sup>c</sup>

<sup>a</sup> Department of Chemistry, Institute for Advanced Studies in Basic Sciences (IASBS),  
PO-Box 45195-1159, Gavazang, Zanjan 45137-6731, Iran

Fax: (+98-241-4214949)

E-mail: [karimi@iasbs.ac.ir](mailto:karimi@iasbs.ac.ir)

<sup>b</sup> Department of Anatomy and Cell Biology and Facility for Electron Microscopy Research,  
McGill University, Montreal, Quebec, H3A 2A7 Canada

<sup>c</sup> Universidad de Córdoba, Campus de Rabanales, Edificio Marie Curie (C-3), Ctra Nnal IV-A,  
Km 396, Córdoba, Spain

## Contents:

|                                                                                                                                                   |     |
|---------------------------------------------------------------------------------------------------------------------------------------------------|-----|
| <b>Figure S1.</b> $^1\text{H}$ NMR spectra of the 1,3-bis(3-trimethoxysilylpropyl)-imidazolium chloride (BTMSPCI) in the $\text{CDCl}_3$ .....    | S4  |
| <b>Figure S2.</b> $^{13}\text{C}$ NMR spectra of the 1,3-bis(3-trimethoxysilylpropyl)-imidazolium chloride (BTMSPCI) in the $\text{CDCl}_3$ ..... | S5  |
| <b>Figure S3.</b> Nitrogen adsorption-desorption isotherm for unplugged B20-BFPMO-B.....                                                          | S6  |
| <b>Figure S4.</b> Pore size distribution for unplugged B20-BFPMO-B.....                                                                           | S7  |
| <b>Figure S5</b> EDS pattern for B5-BFPMO-A.....                                                                                                  | S8  |
| <b>Figure S6</b> EDS pattern for B5-BFPMO-B.....                                                                                                  | S8  |
| <b>Figure S7</b> EDS pattern for B5-BFPMO-C.....                                                                                                  | S9  |
| <b>Figure S8.</b> SEM image for the B5-BFPMO-A.....                                                                                               | S9  |
| <b>Figure S9.</b> SEM image for the B5-BFPMO-B.....                                                                                               | S10 |
| <b>Figure S10.</b> SEM image for the B5-BFPMO-C.....                                                                                              | S10 |
| <b>Figure 11.</b> XRD patterns for B5-BFPMO-A, -B, and -C.....                                                                                    | S11 |
| <b>Figure S12.</b> TG pattern for B5-BFPMO-A.....                                                                                                 | S11 |
| <b>Figure S13.</b> TG pattern for B5-BFPMO-B.....                                                                                                 | S12 |
| <b>Figure S14.</b> TG pattern for B5-BFPMO-C.....                                                                                                 | S12 |
| <b>Figure S15.</b> Nitrogen adsorption-desorption isotherm for unplugged E150-BFPMO-B.....                                                        | S13 |
| <b>Figure S16.</b> Pore size distribution for unplugged E15-BFPMO-B.....                                                                          | S14 |
| <b>Figure S17.</b> EDS pattern for E10-BFPMO-A.....                                                                                               | S15 |
| <b>Figure S18.</b> EDS pattern for E10-BFPMO-B.....                                                                                               | S15 |
| <b>Figure S19.</b> EDS pattern for E10-BFPMO-C.....                                                                                               | S16 |
| <b>Figure S20.</b> SEM image for E10-BFPMO-A.....                                                                                                 | S16 |

|                                                                  |     |
|------------------------------------------------------------------|-----|
| <b>Figure S21.</b> SEM image for E10-BFPMO-B.....                | S17 |
| <b>Figure S22.</b> SEM image for E10-BFPMO-C.....                | S17 |
| <b>Figure S23.</b> XRD patterns for E10-BFPMO-A, -B, and -C..... | S18 |
| <b>Figure S24.</b> TG pattern for E10-BFPMO-A.....               | S18 |
| <b>Figure S25.</b> TG pattern for E10-BFPMO-B.....               | S19 |
| <b>Figure S26.</b> TG pattern for E10-BFPMO-C.....               | S19 |

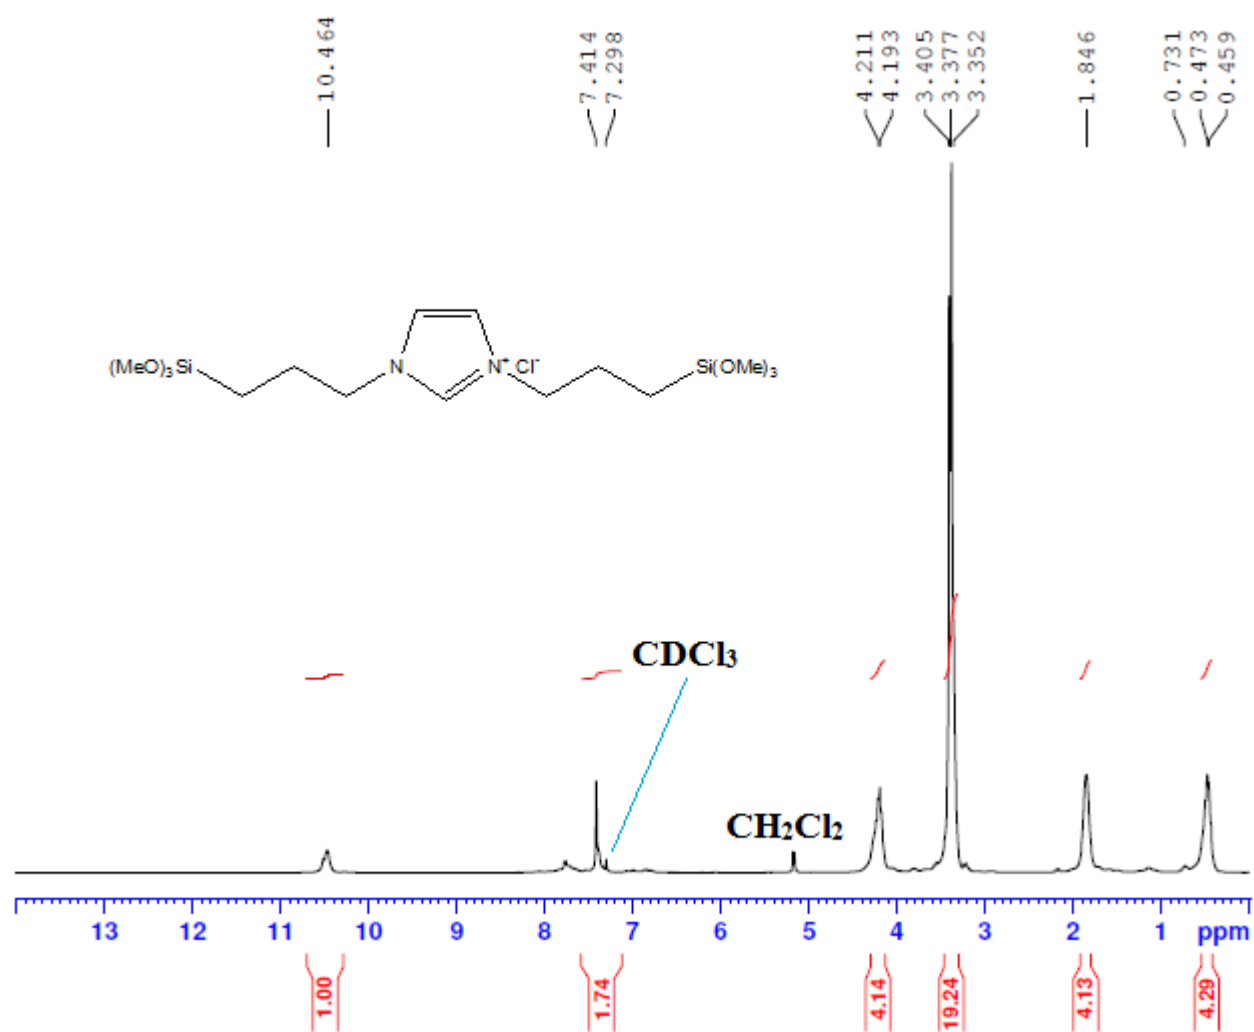

**Figure S1.** <sup>1</sup>H NMR spectra of the 1,3-bis(3-trimethoxysilylpropyl)-imidazolium chloride (BTMSPCl) in the CDCl<sub>3</sub>.

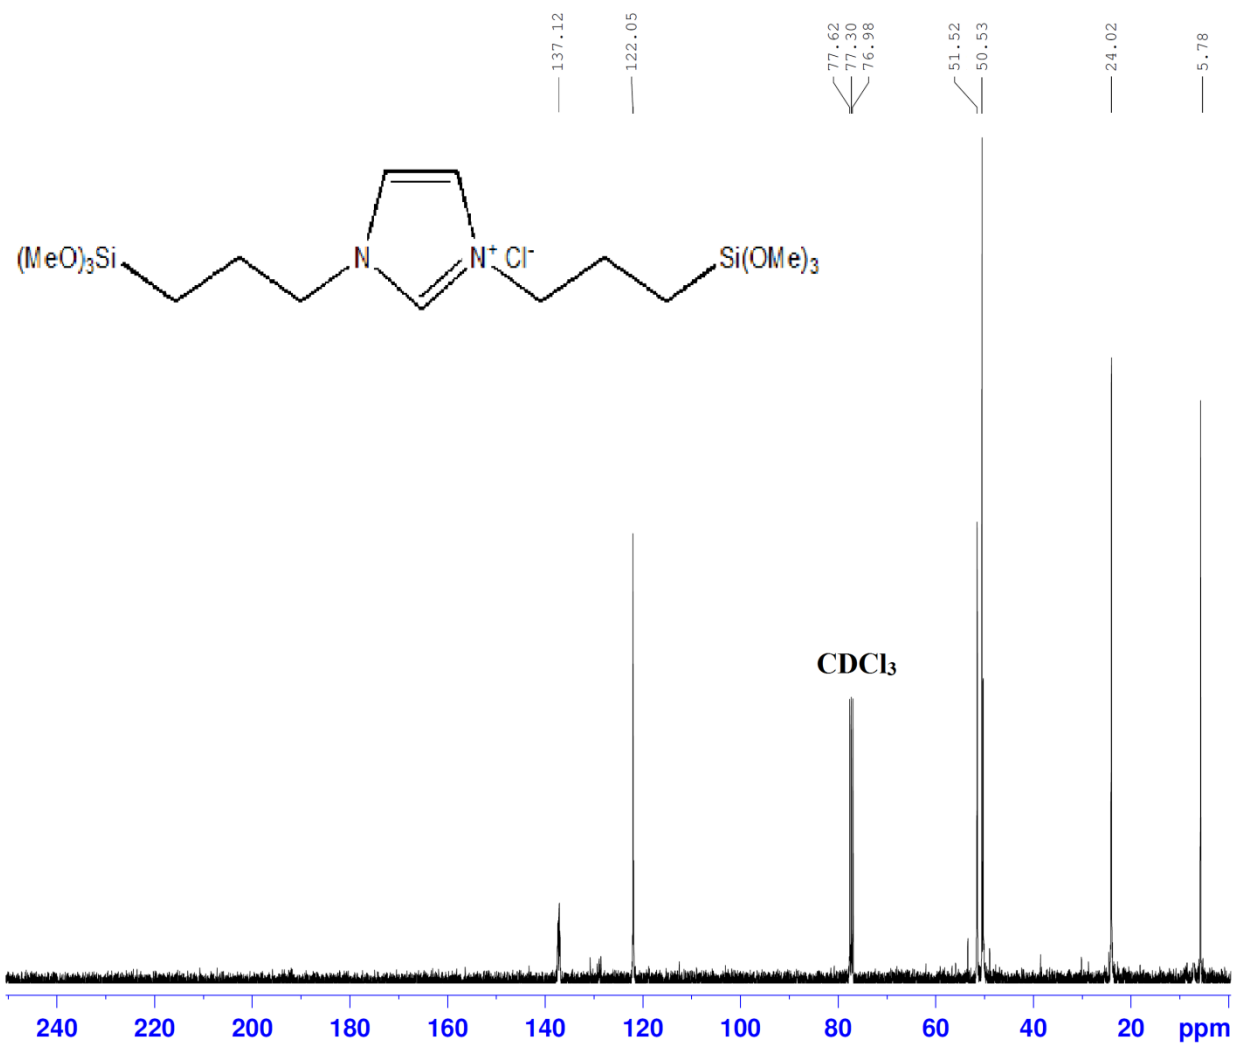

**Figure S2.** <sup>13</sup>C NMR spectra of the 1,3-bis(3-trimethoxysilylpropyl)-imidazolium chloride (BTMSPCl) in the CDCl<sub>3</sub>

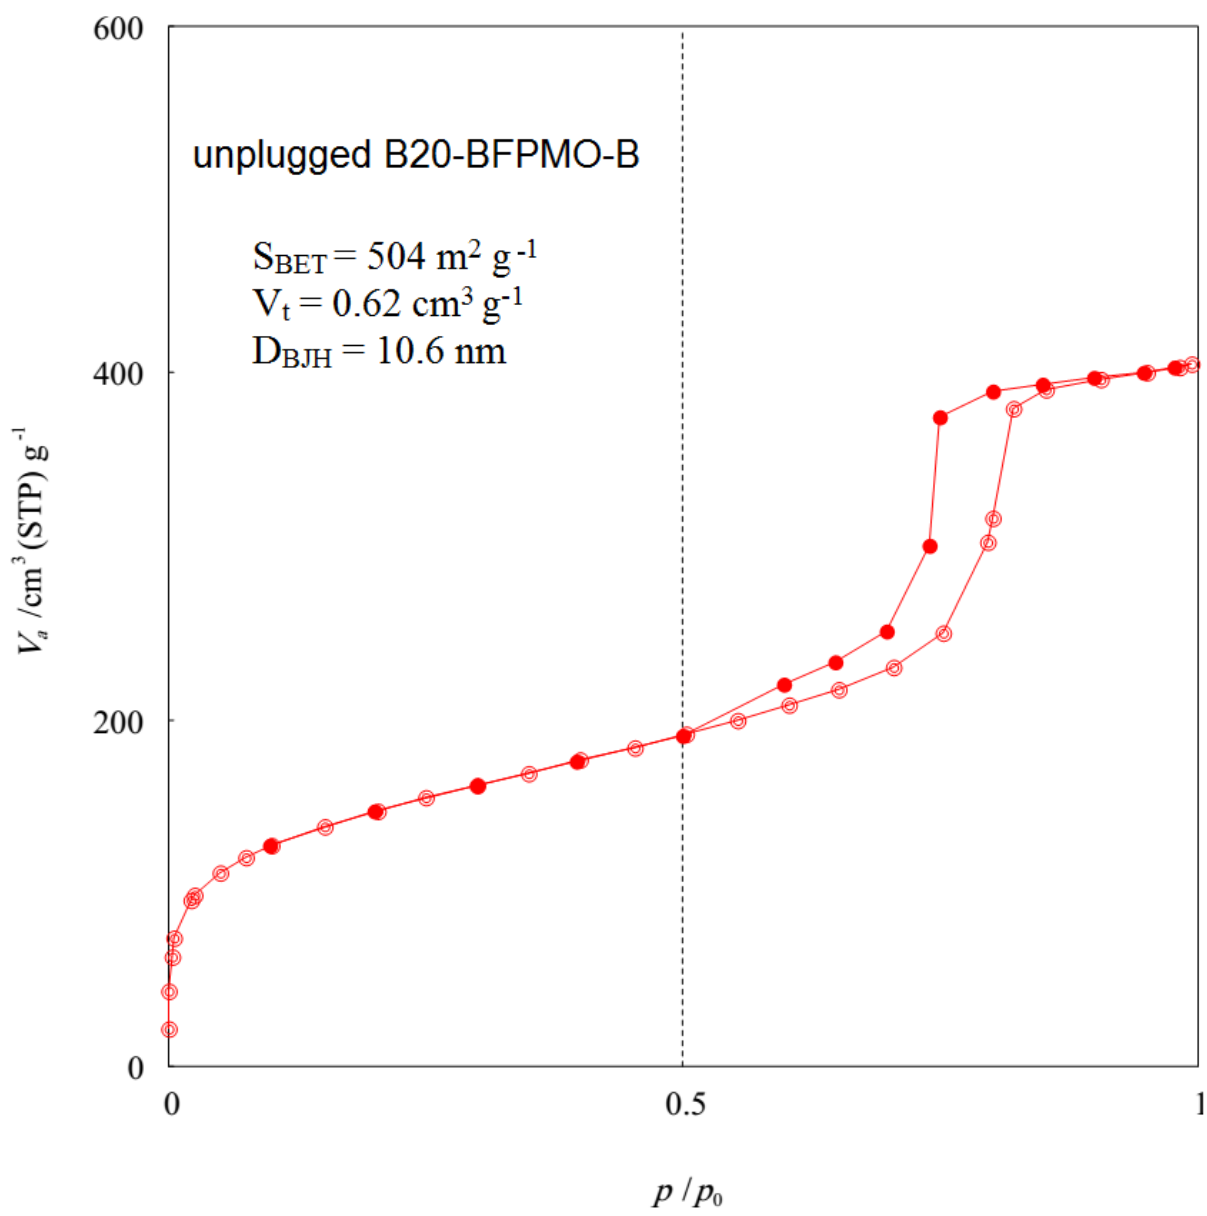

**Figure S3.** Nitrogen adsorption-desorption isotherm for unplugged B20-BFPMO-B

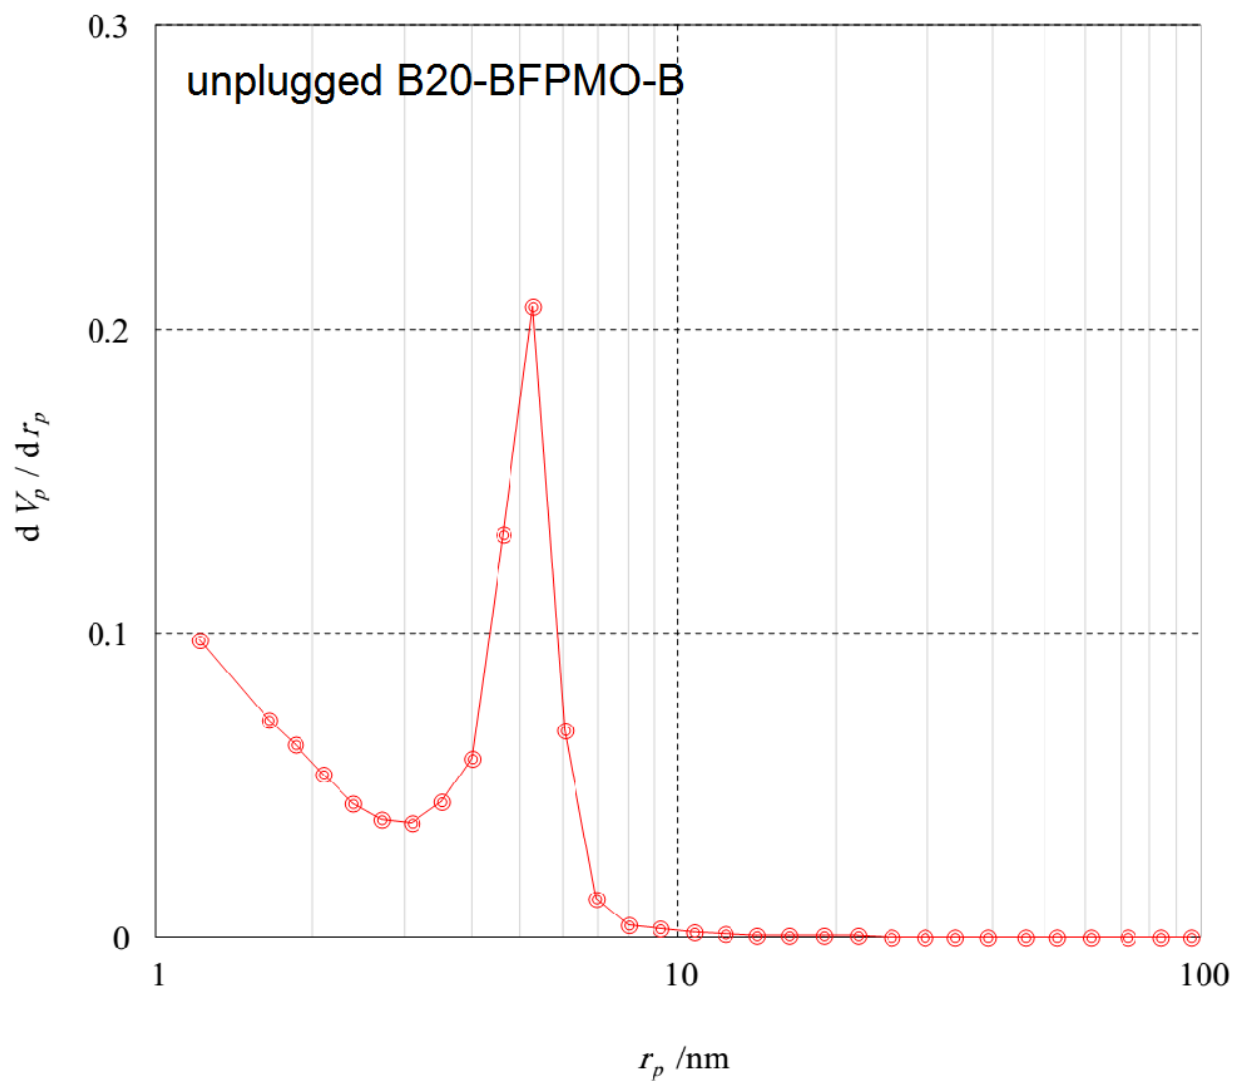

**Figure S4.** Pore size distribution for unplugged B20-BFPMO-B

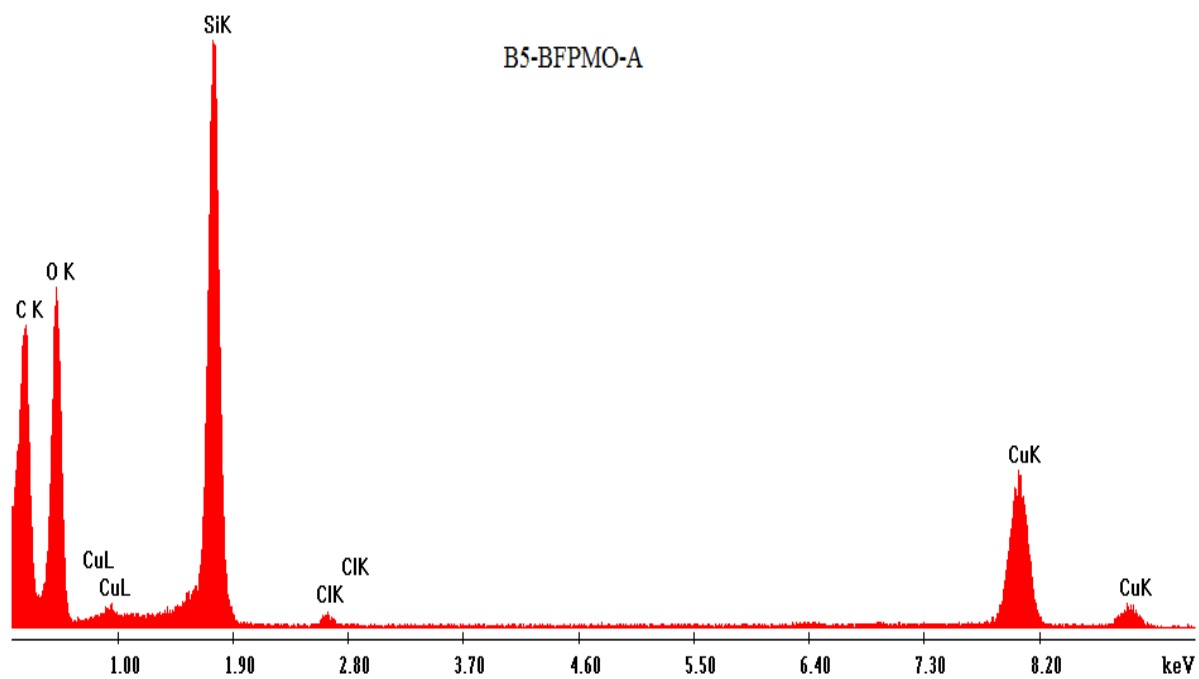

**Figure S5** EDS pattern for B5-BFPMO-A

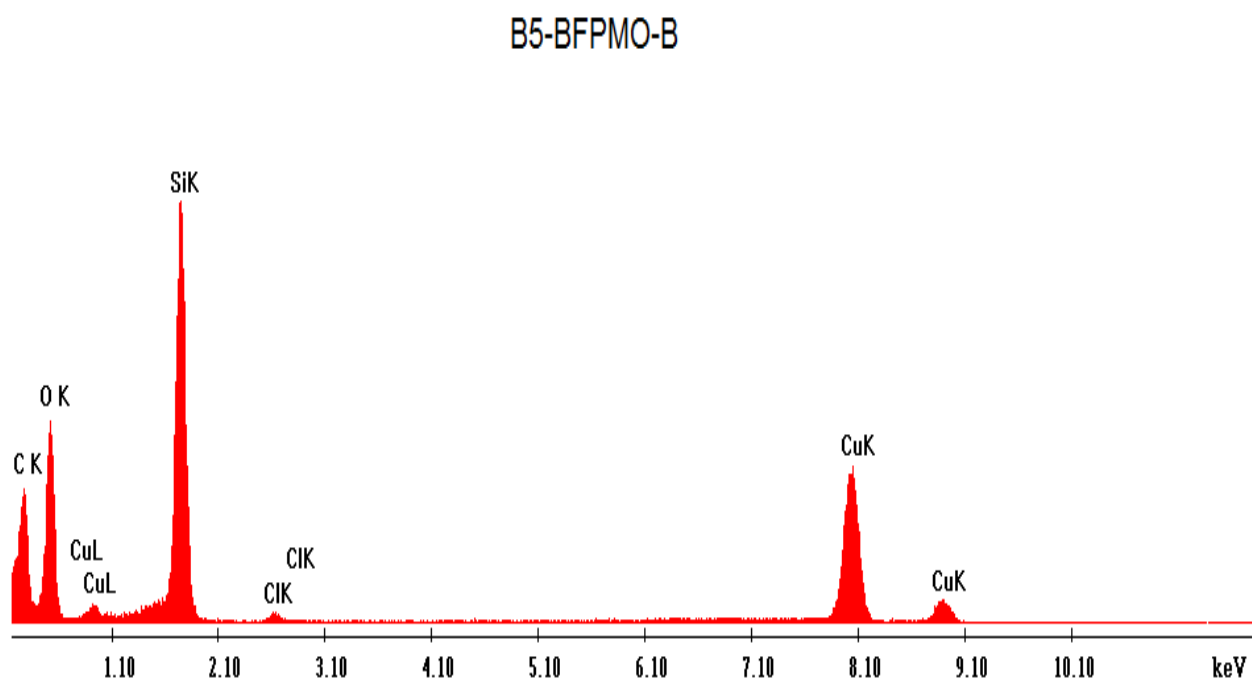

**Figure S6** EDS pattern for B5-BFPMO-B



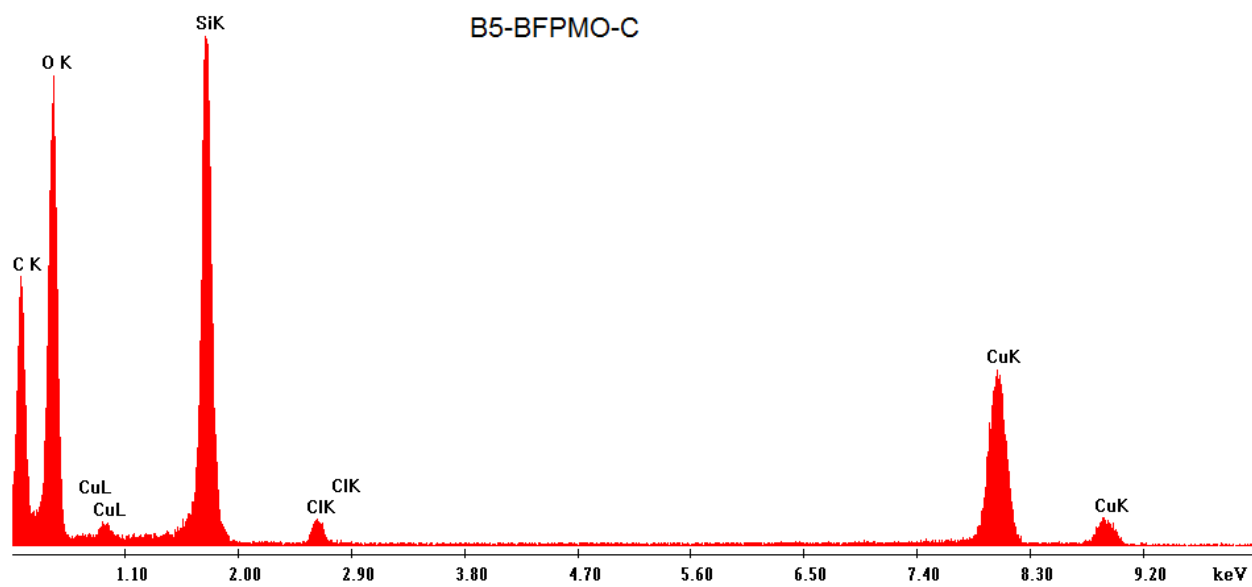

Figure S7 EDS pattern for B5-BFPMO-C.

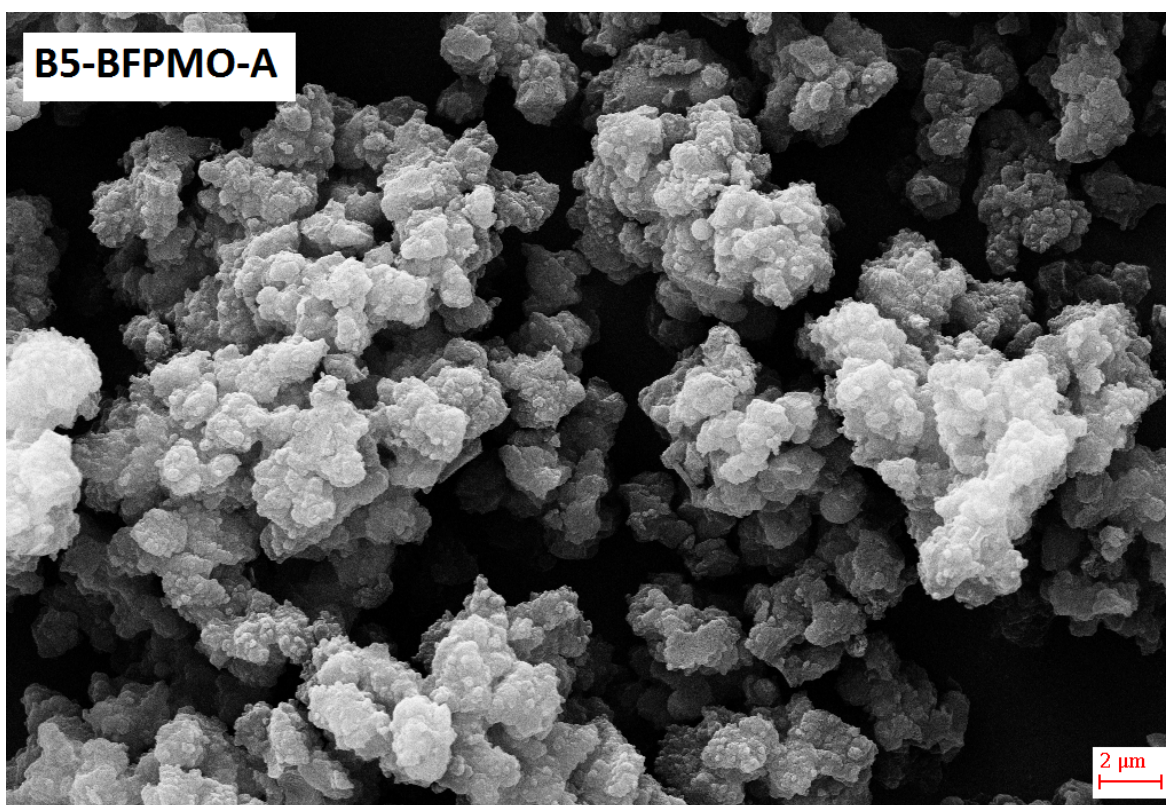

Figure S8. SEM image for the B5-BFPMO-A

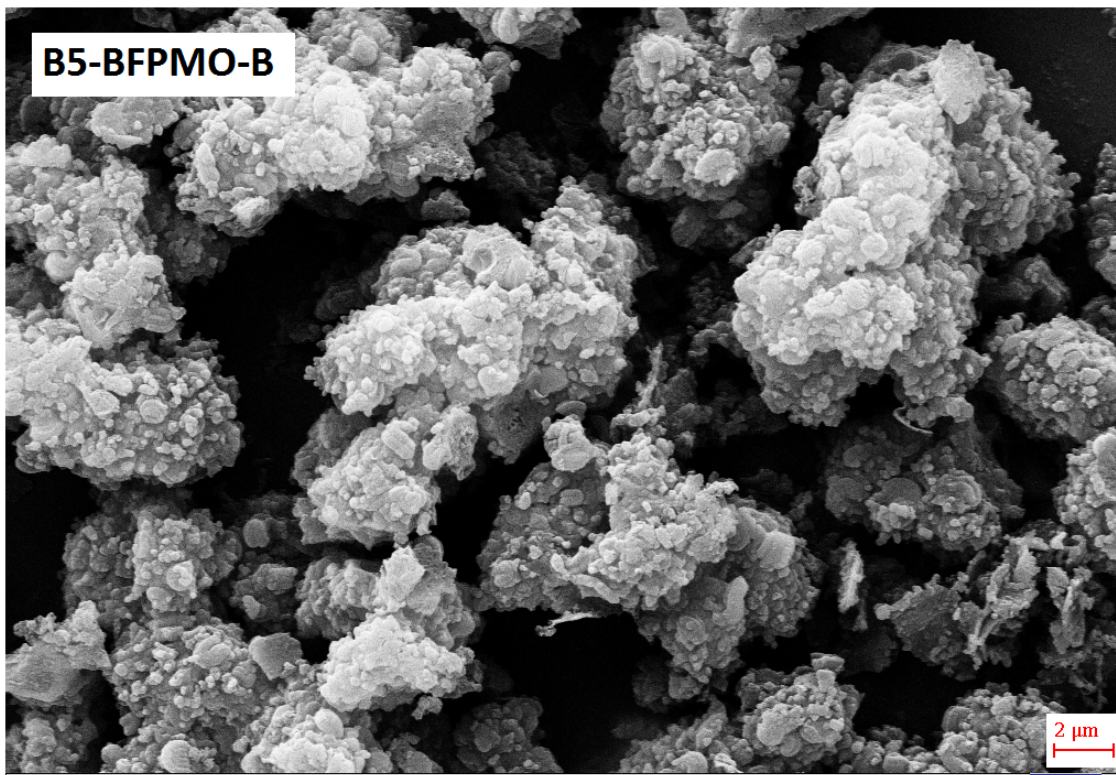

**Figure S9.** SEM image for the B5-BFPMO-B

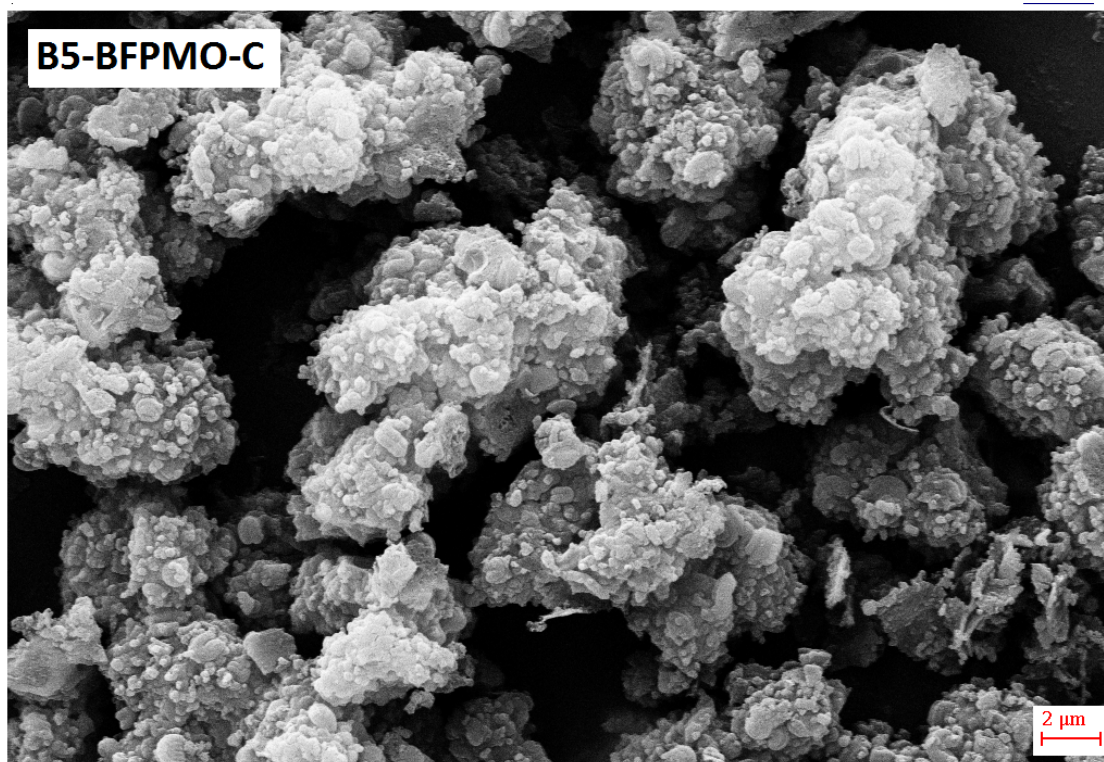

**Figure S10.** SEM image for the B5-BFPMO-C

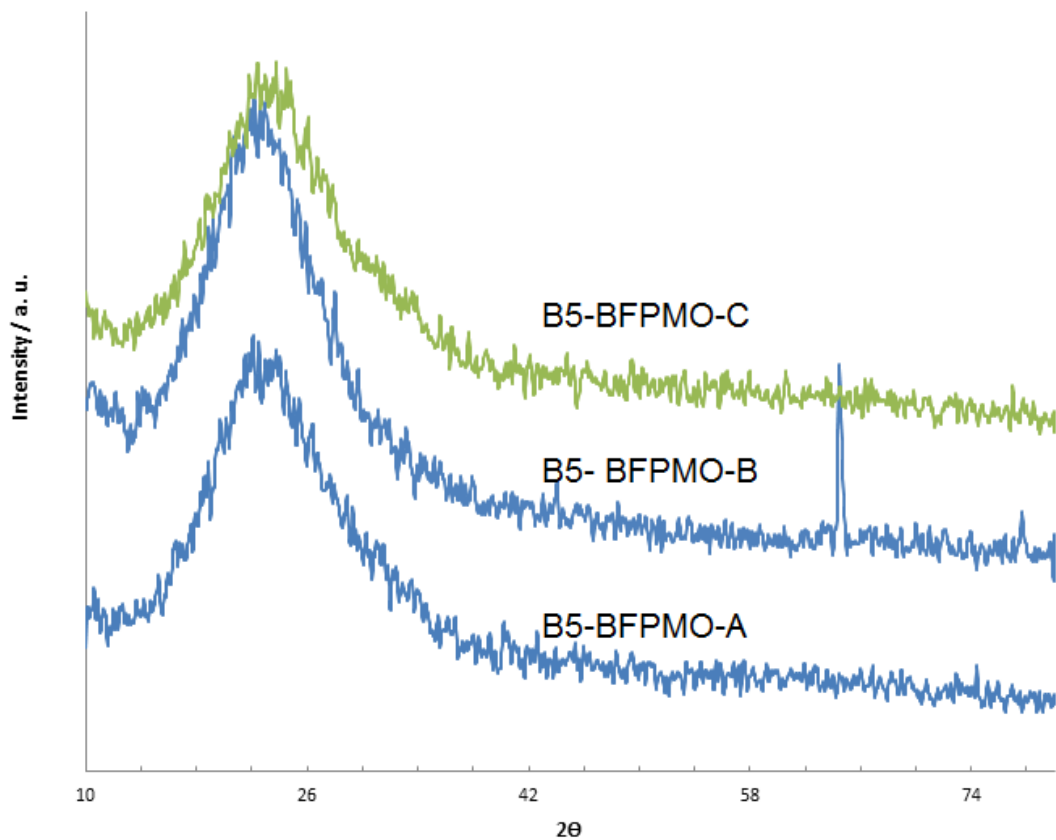

**Figure 11.** XRD pattern for B5-BFPMO-A, -B, and -C

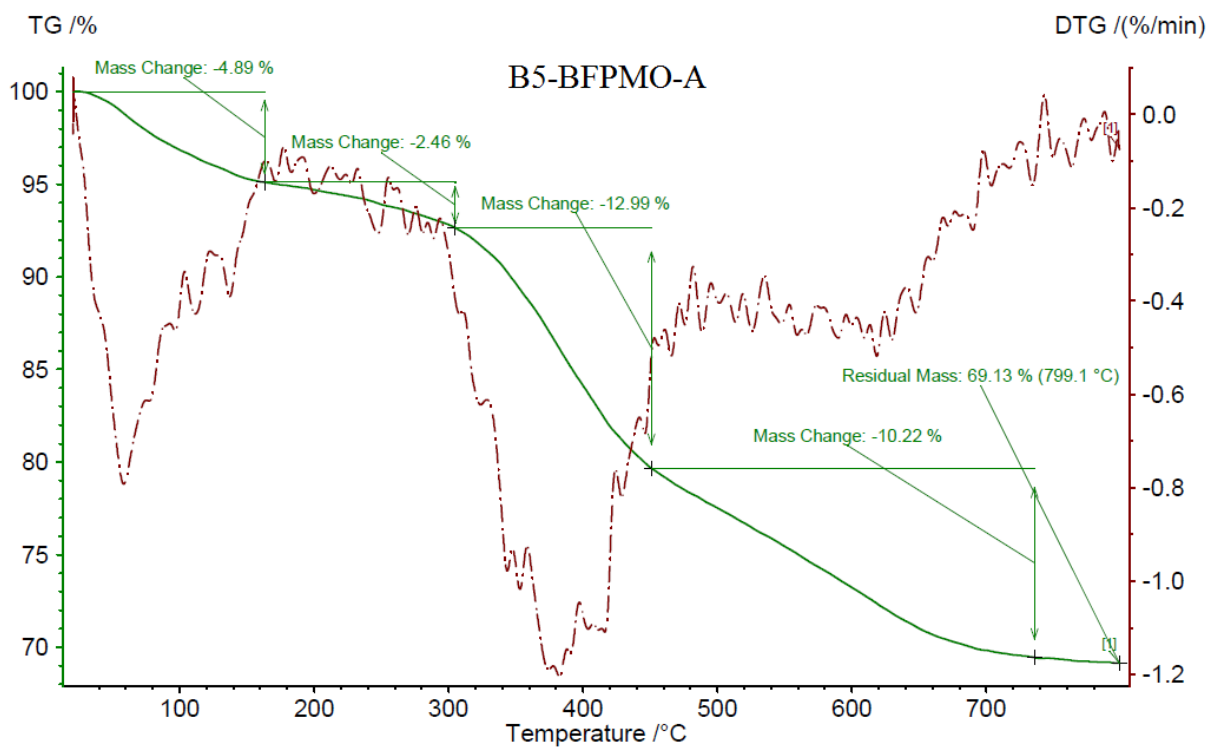

**Figure S12.** TG pattern for B5-BFPMO-A



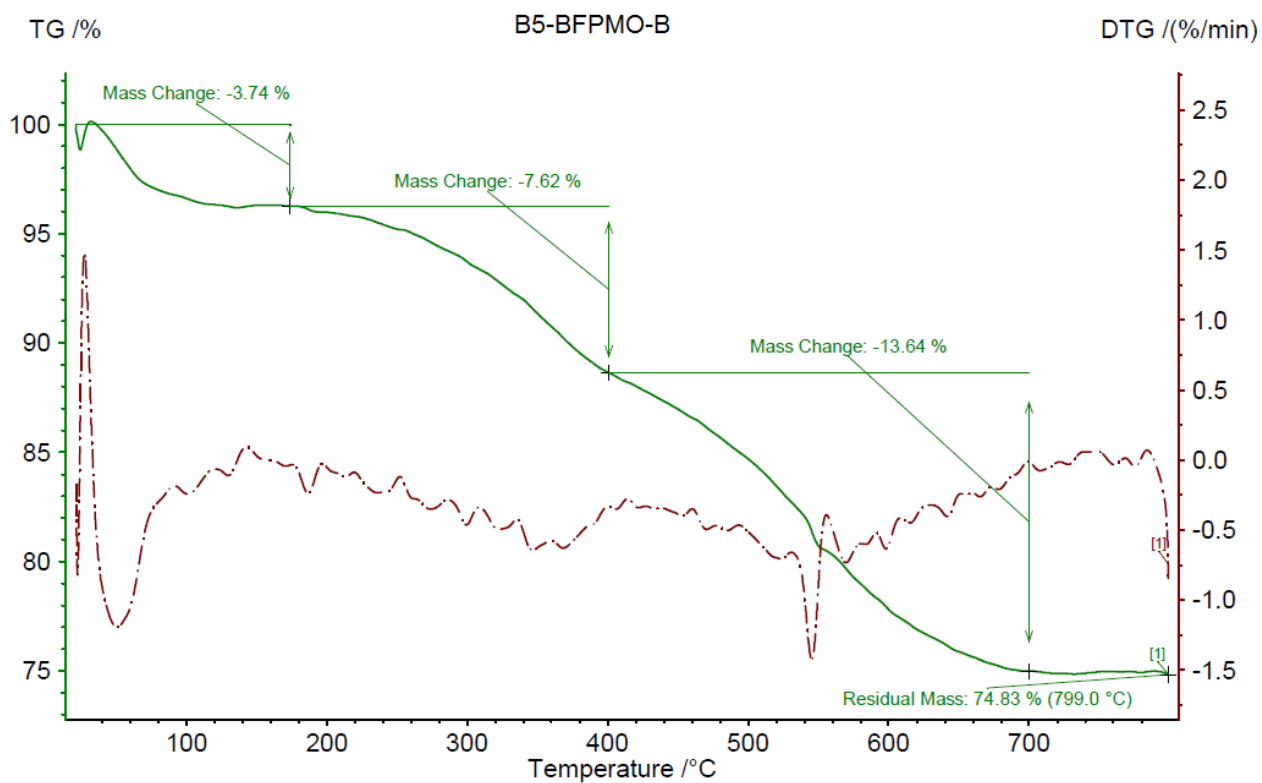

**Figure S13.** TG pattern for B5-BFPMO-B

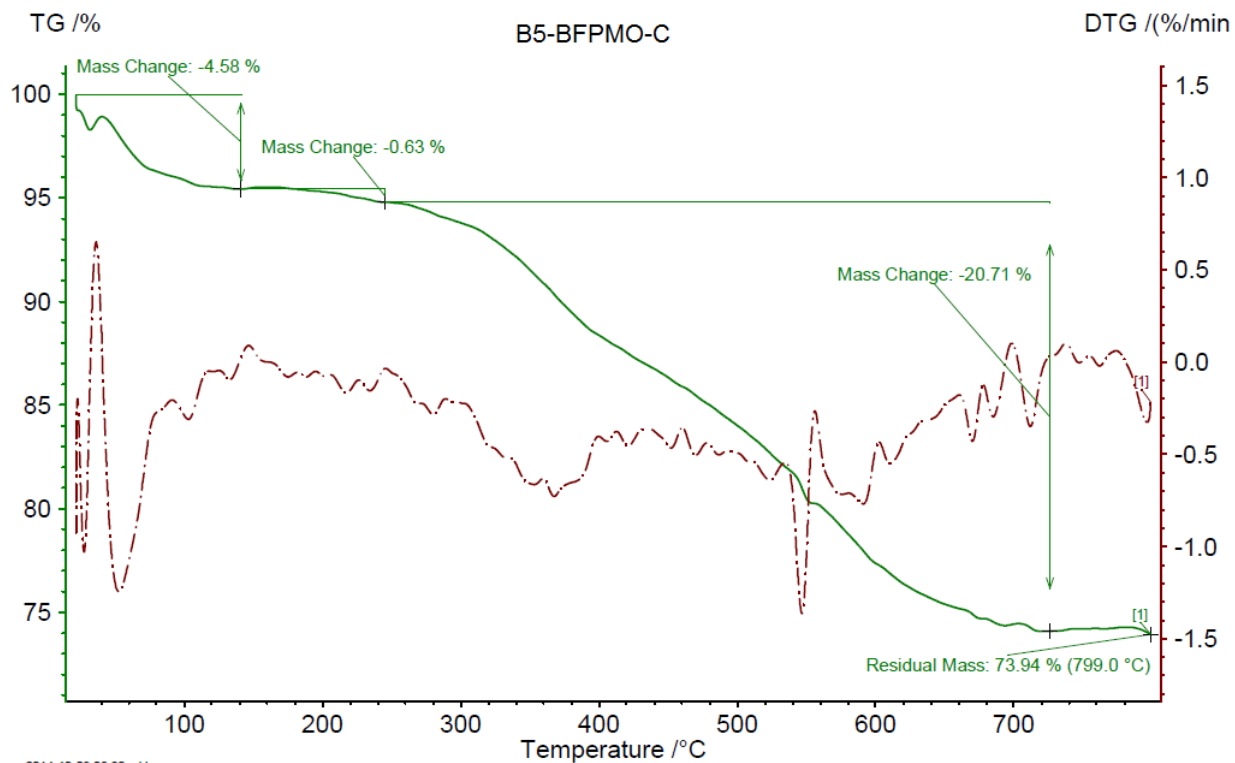

**Figure S14.** TG pattern for B5-BFPMO-C

2014-10-09 08:32 User: user

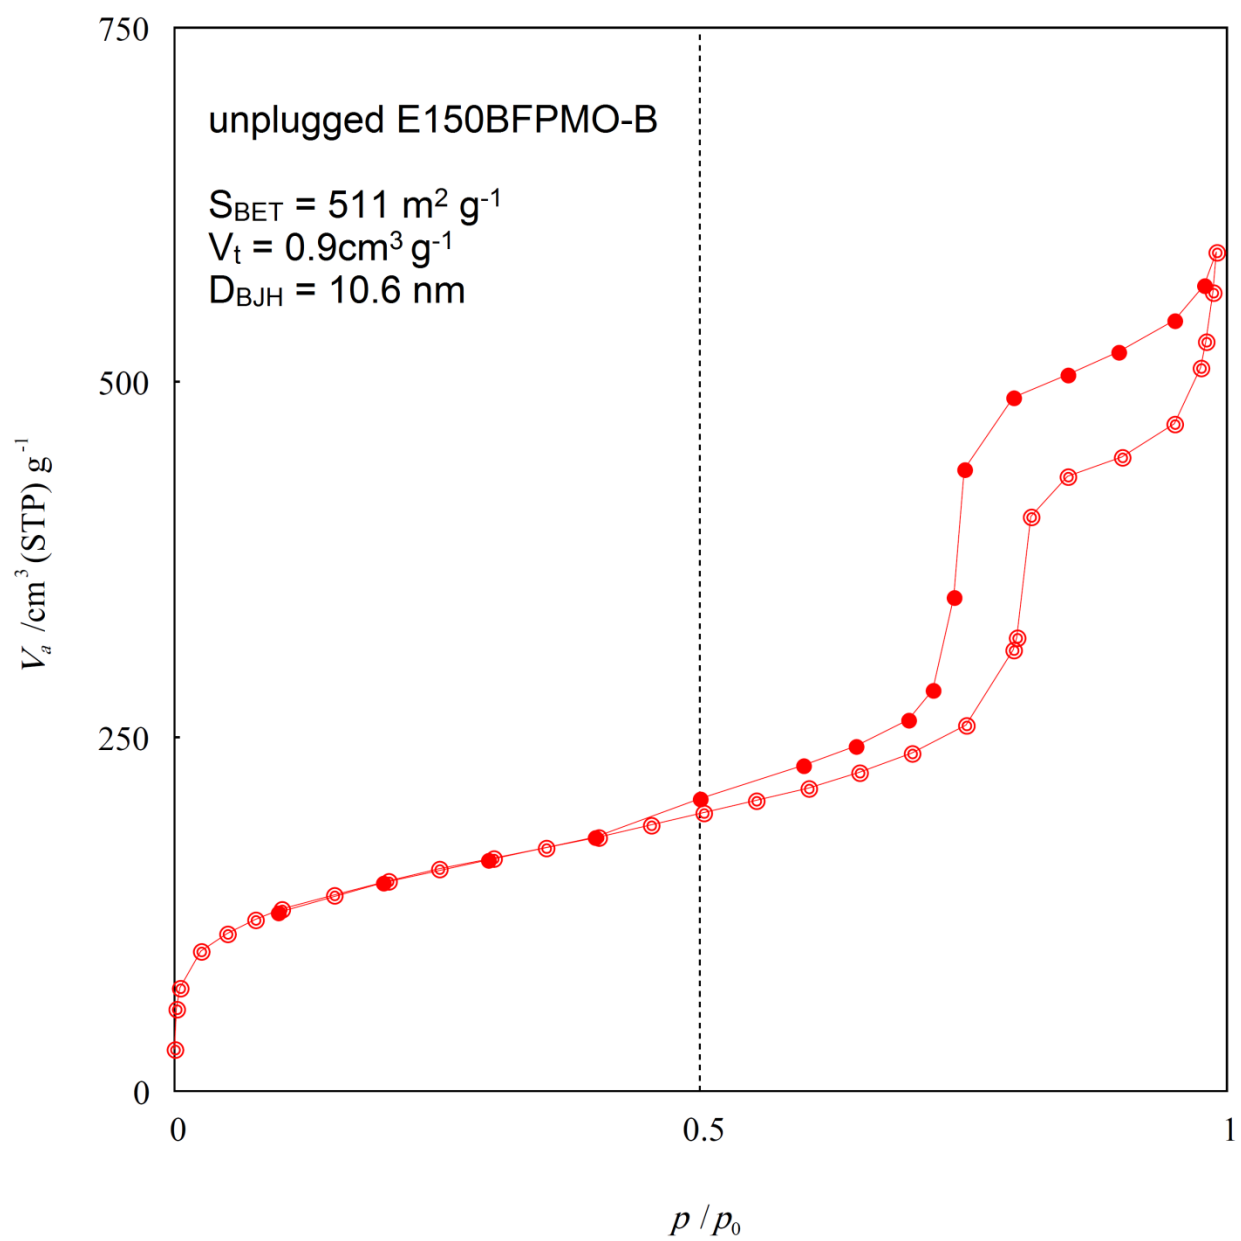

**Figure S15.** Nitrogen adsorption-desorption isotherm for unplugged E150-BFPMO-B

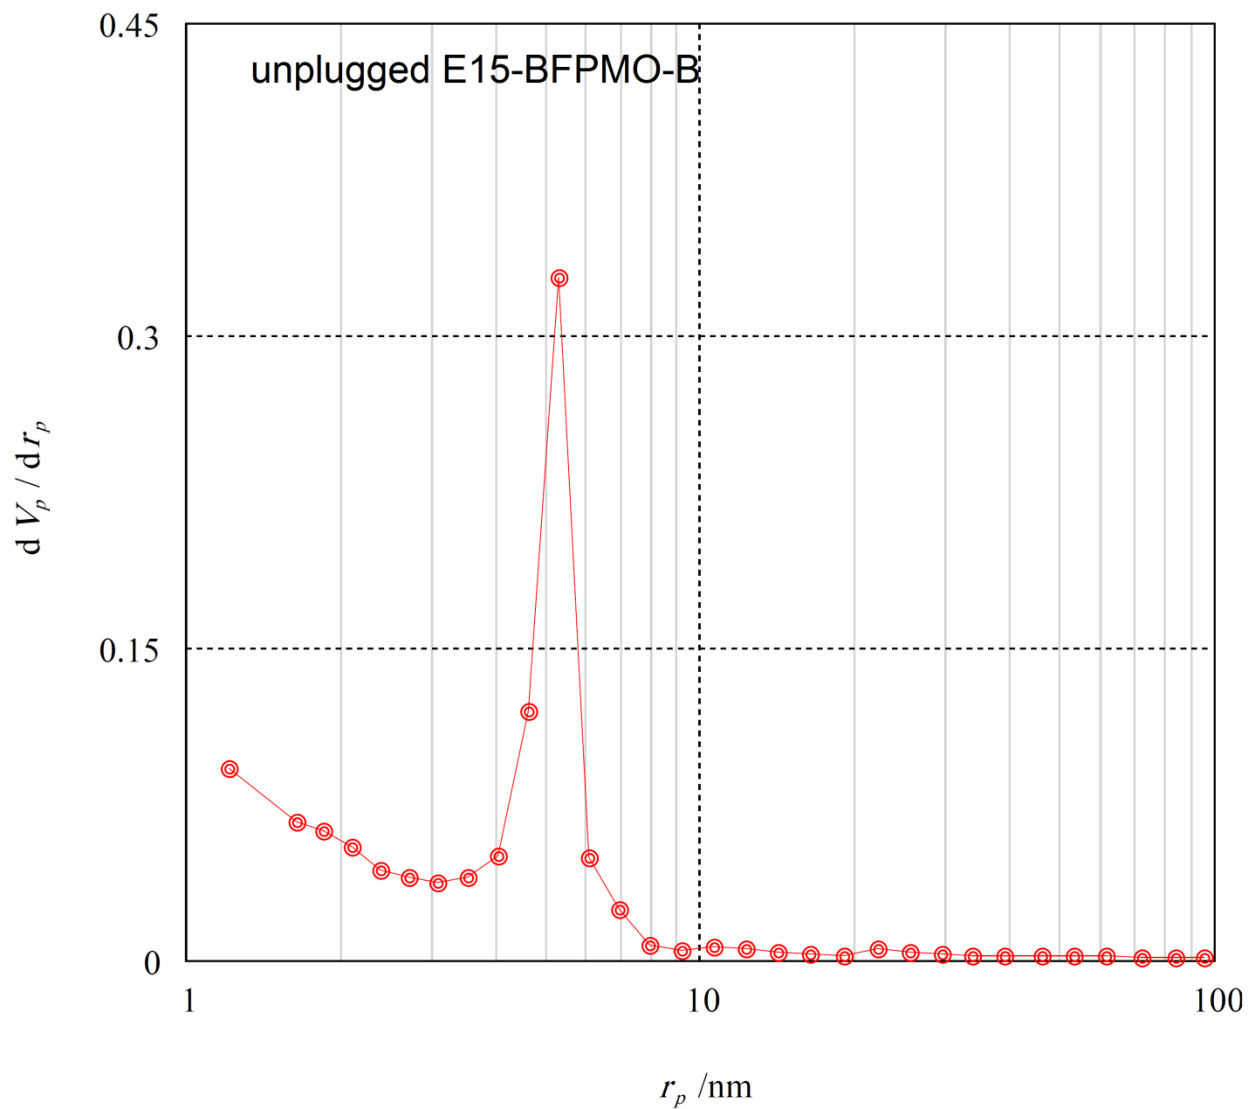

**Figure S16.** Pore size distribution for unplugged E15-BFPMO-B

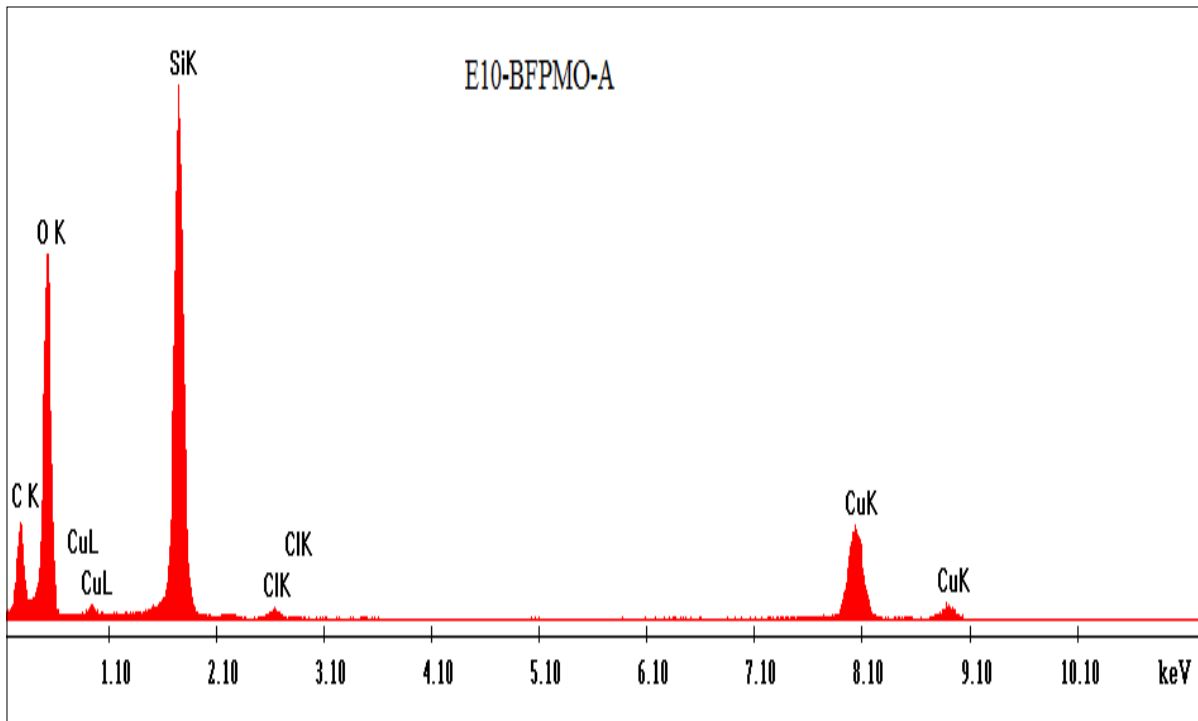

**Figure S17.** EDS pattern for E10-BFPMO-A

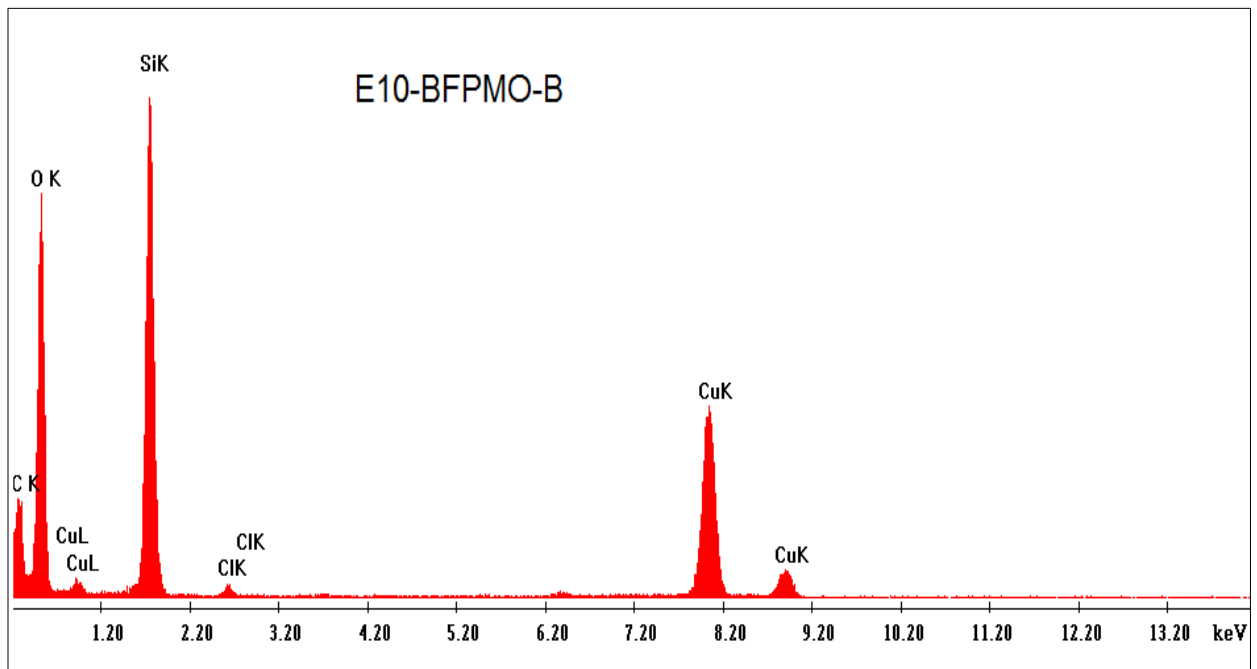

**Figure S18.** EDS pattern for E10-BFPMO-B

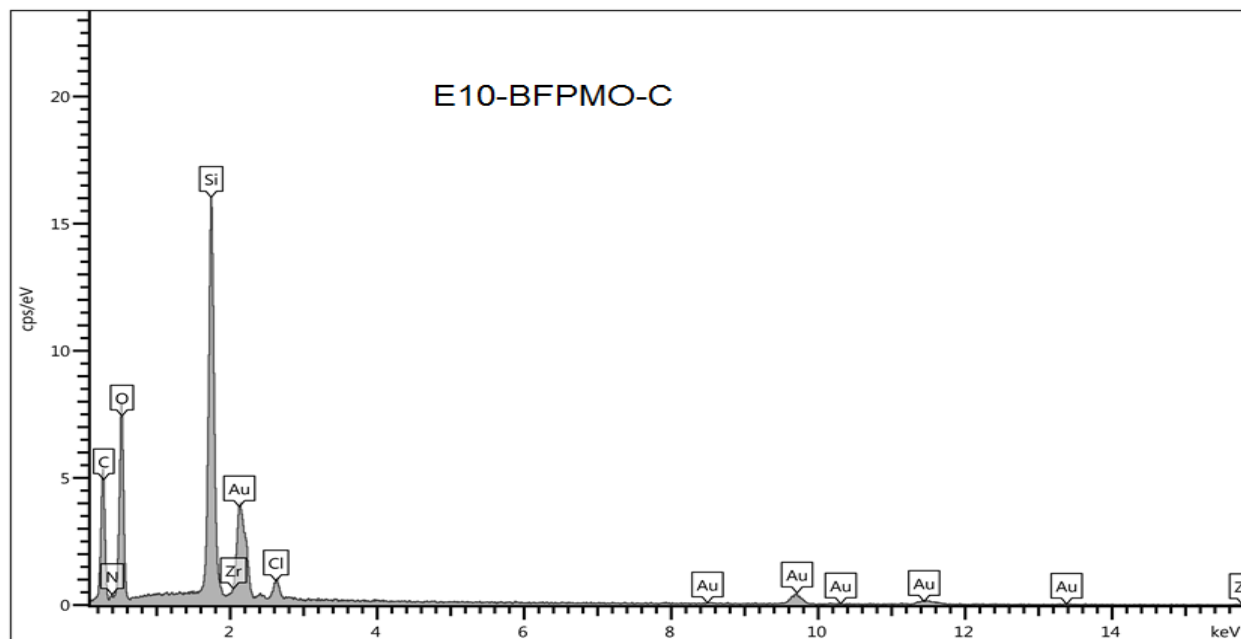

Figure S19. EDS pattern for E10-BFPMO-C

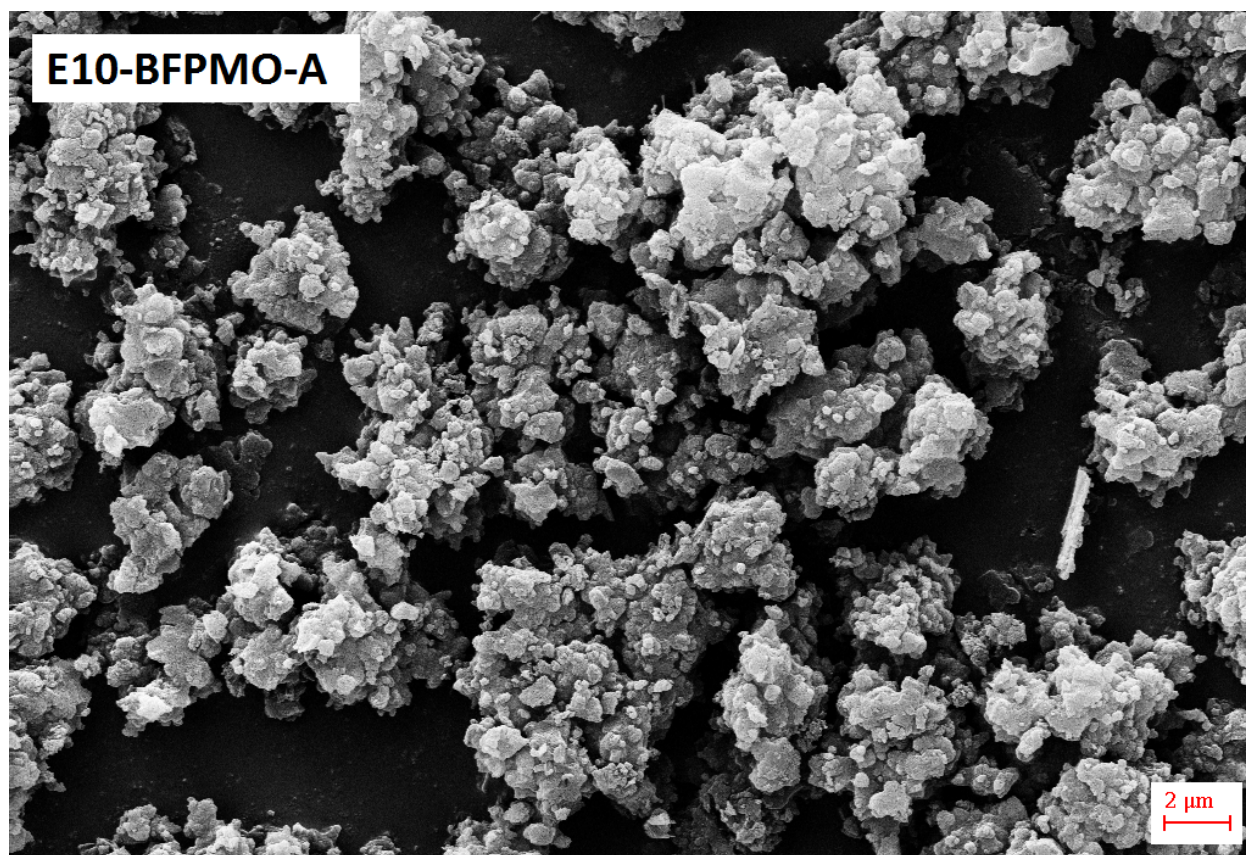

Figure S20. SEM image for E10-BFPMO-A



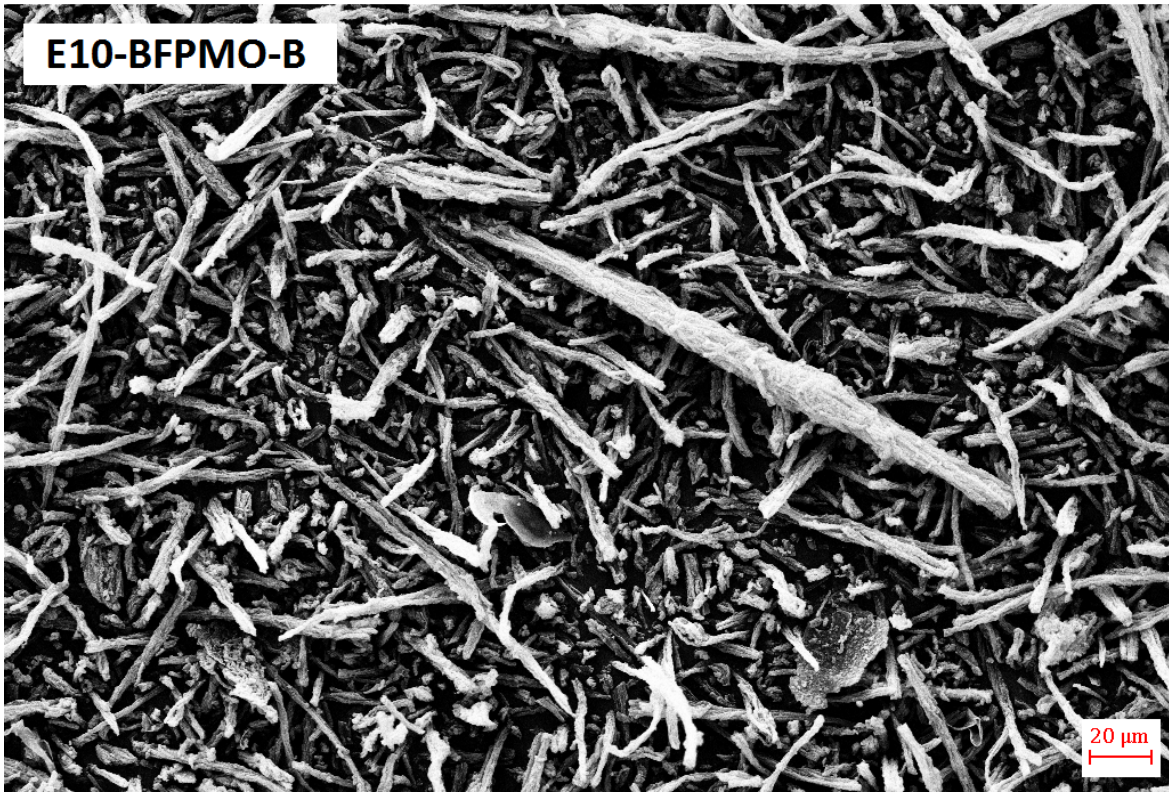

**Figure S21.** SEM image for E10-BFPMO-B

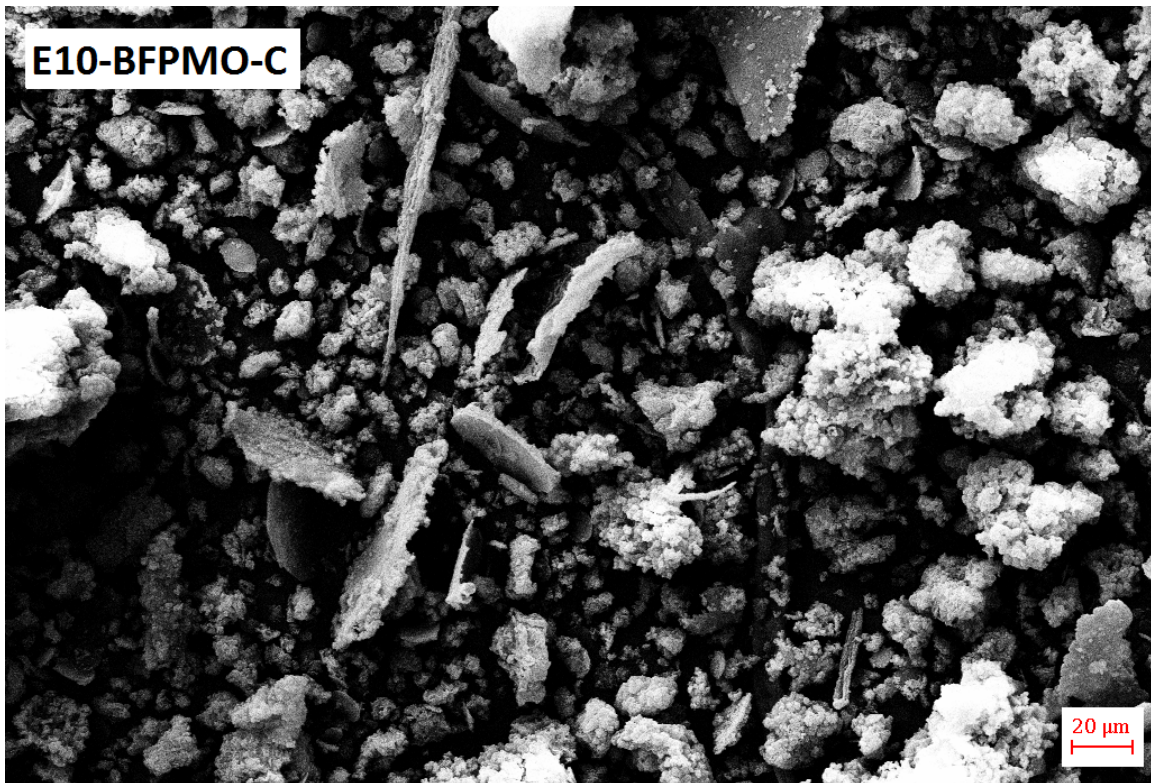

**Figure S22.** SEM image for E10-BFPMO-C

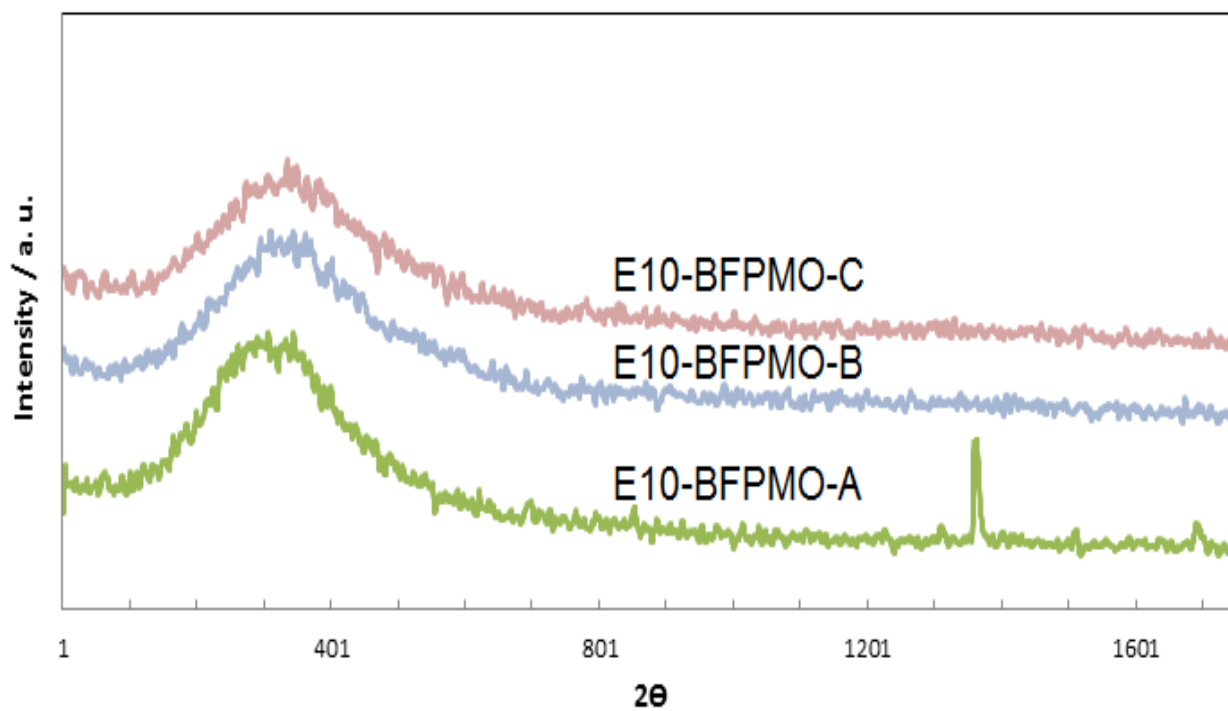

**Figure S23.** XRD pattern for E10-BFPMO-A, -B, and -C

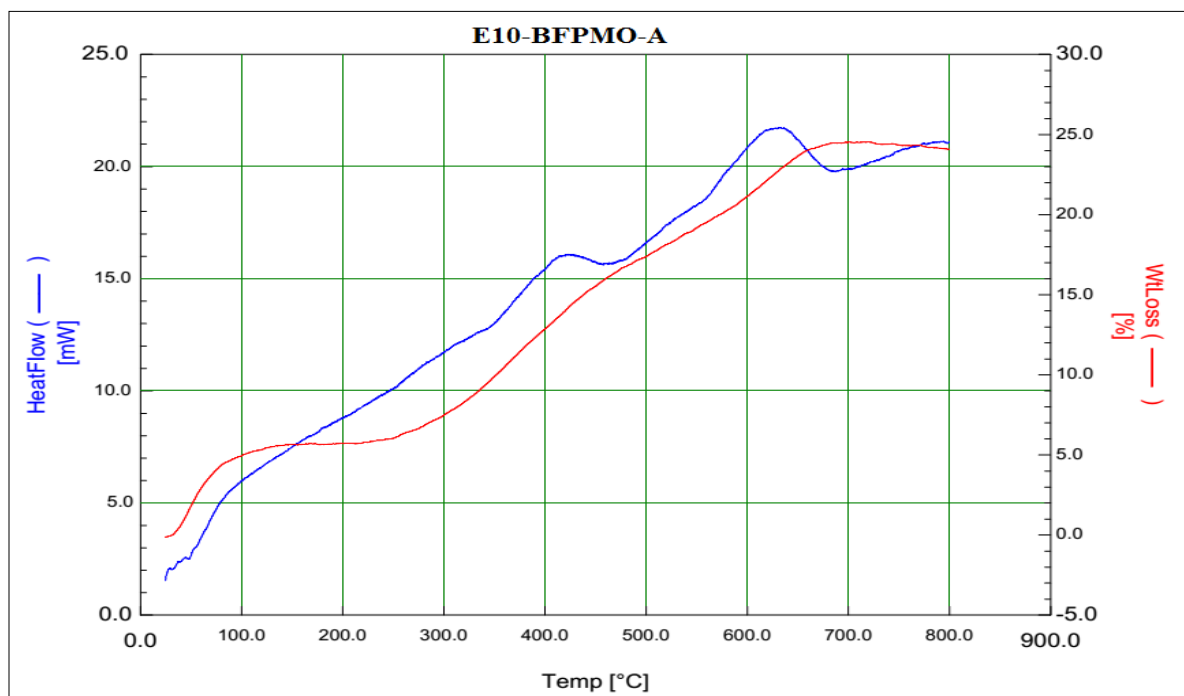

**Figure S24.** TG pattern for E10-BFPMO-A

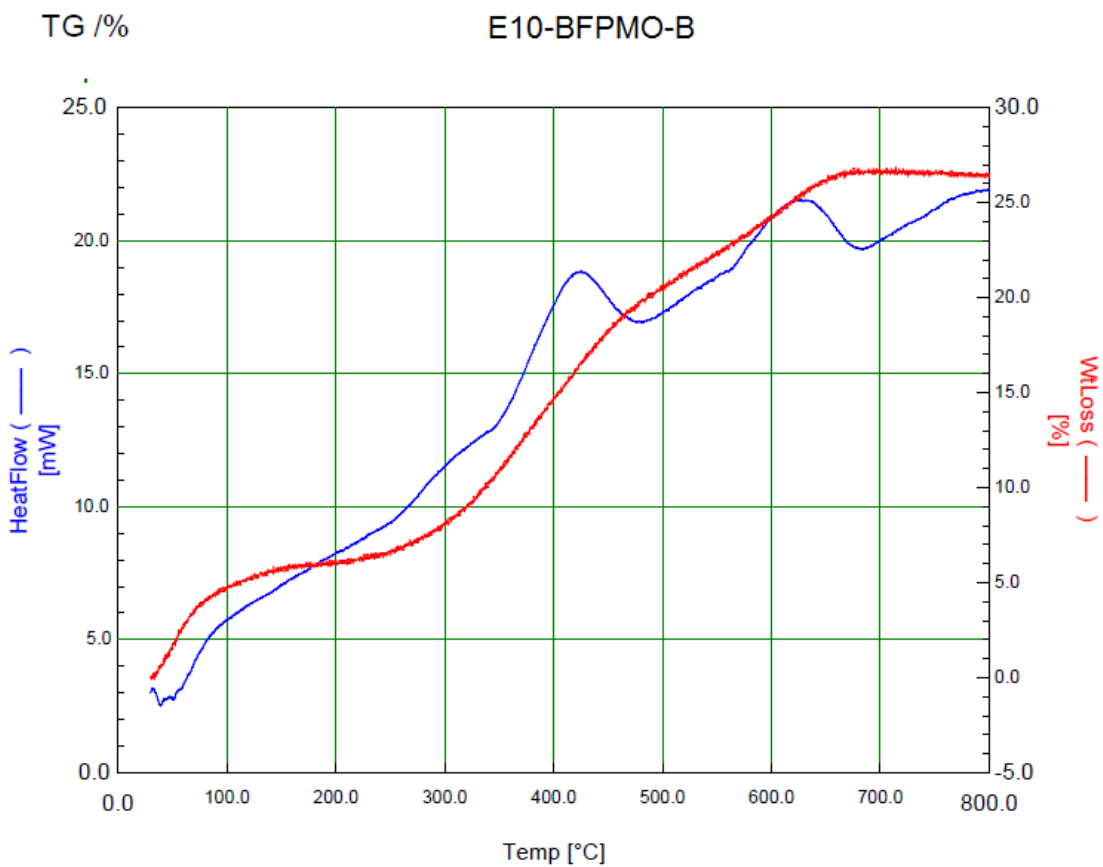

Figure S25. TG pattern for E10-BFPMO-B

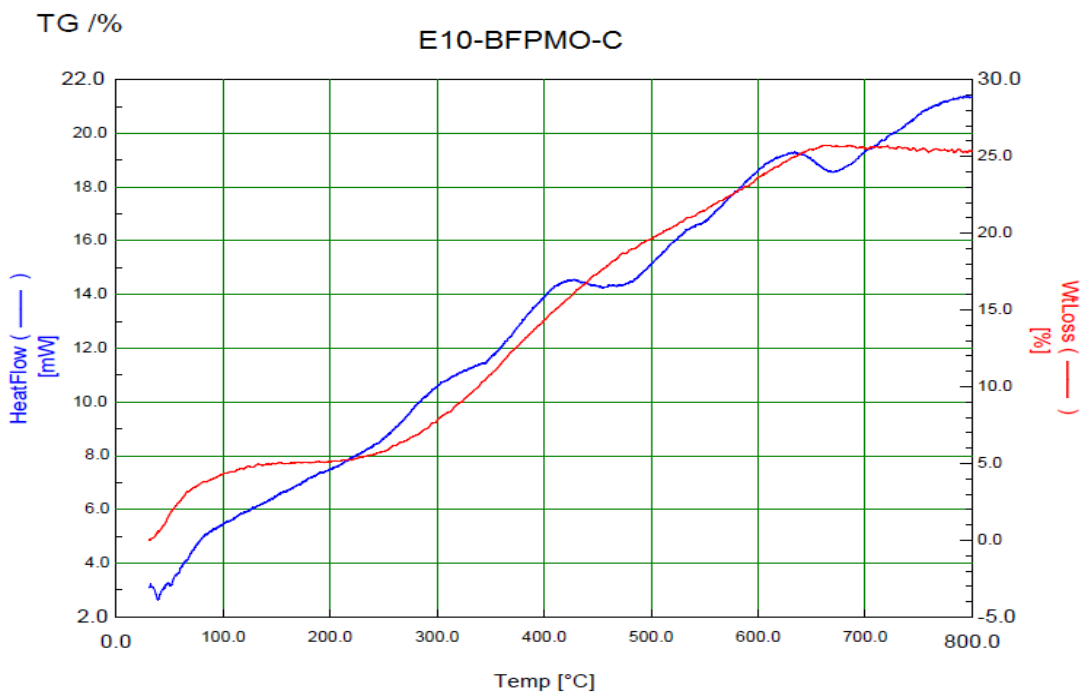

Figure S26. TG pattern for E10-BFPMO-C
